# Supplementary material for: Pathway-Driven Discovery of Rare Mutational Impact on Cancer
Source: Hindawi journal article supplement (doi:10.1155/2014/171892), 2014-01-01

**Supplement Figure 1.** The schematic diagram of the Pathway-driven discovery of rare mutational impact on cancer. A diagram describes the 'while' loop part in the pseudo-code.

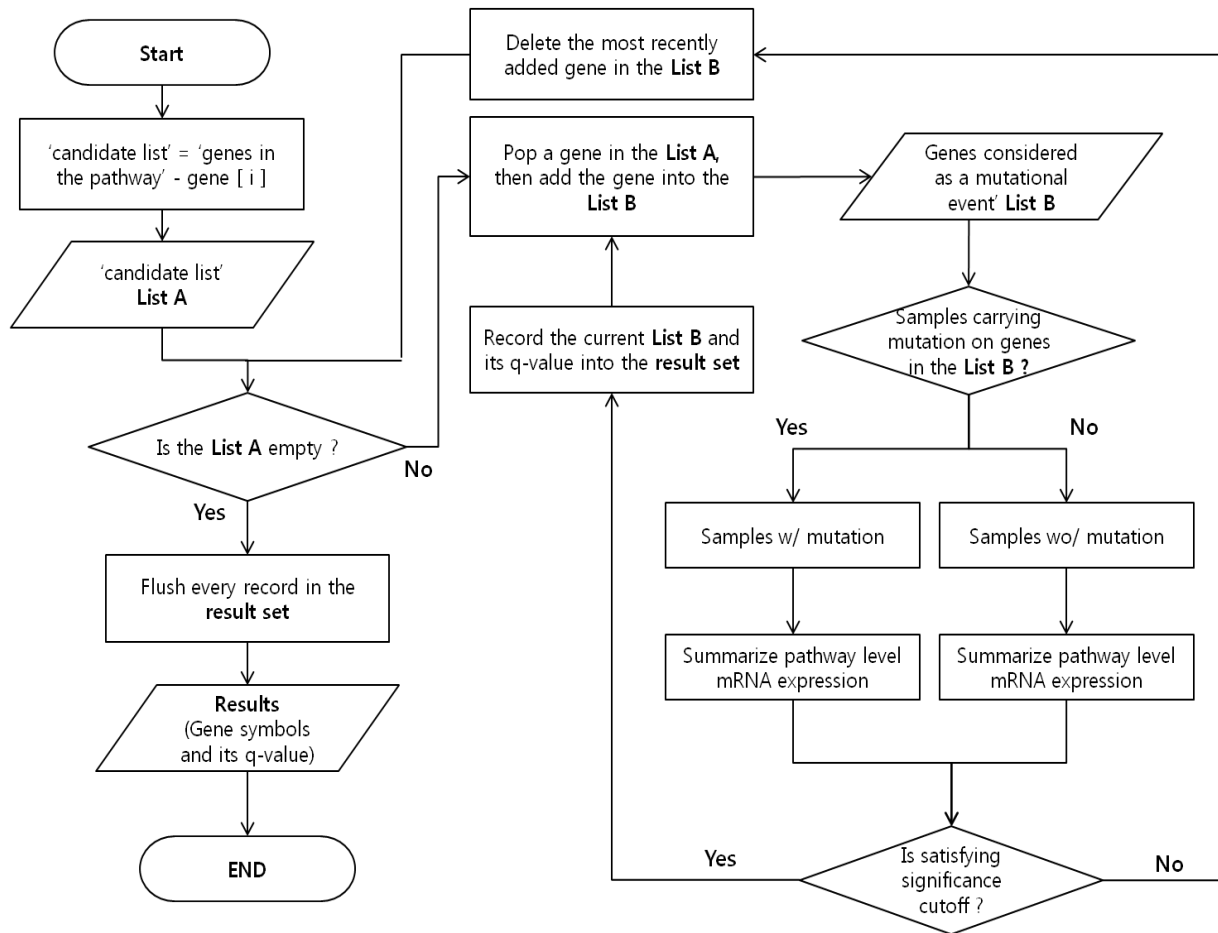

Supplement: f1 [file 171892.f1.pdf]
