# Supplementary material for: Pathway-Driven Discovery of Rare Mutational Impact on Cancer
Source: Hindawi journal article supplement (doi:10.1155/2014/171892), 2014-01-01
Supplement: f2 [file 171892.f2.pdf]

**Supplement Figure 2.** Comparing mutated genes showing pathway level mRNA difference (Discovered) to genes reported as significantly mutated in breast cancer. Supplement table 1 provide detailed information.

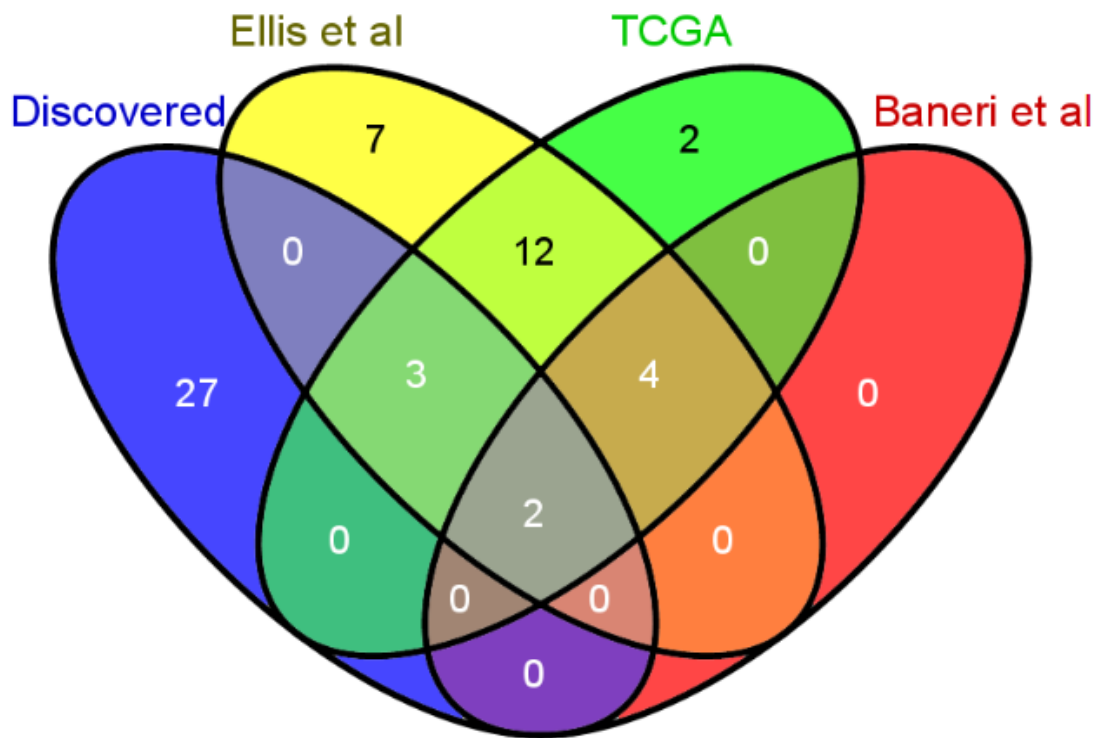

Ellis, M. J. & Perou, C. M. (2013) 'The genomic landscape of breast cancer as a therapeutic roadmap', *Cancer Discov*, 3, 27-34.

TCGA (2012) 'Comprehensive molecular portraits of human breast tumours', *Nature*, 490, pp.61-70.

Banerji, S., Cibulskis, K., Rangel-Escareno, C., Brown, K. K., Carter, S. L., Frederick, A. M., et al. (2012) 'Sequence analysis of mutations and translocations across breast cancer subtypes.', *Nature*, 486, 405-409.
