# Supplementary material for: Pathway-Driven Discovery of Rare Mutational Impact on Cancer
Source: Hindawi journal article supplement (doi:10.1155/2014/171892), 2014-01-01
Supplement: f3 [file 171892.f3.pdf]

**Supplement Table 1.** A list of mutated genes showing pathway level mRNA difference (Discovered) and genes previously reported as significantly mutated in breast cancer

| Discovered | Ellis et al., | TCGA   | Baneri et al., |
|------------|---------------|--------|----------------|
| AKT1       | AKT1          | PIK3CA | TP53           |
| AKT2       | CBFB          | TP53   | PIK3CA         |
| AKT3       | CDH1          | MAP3K1 | AKT1           |
| BPNT1      | CDKN1B        | MAP2K4 | CBFB           |
| BRAF       | CTCF          | GATA3  | GATA3          |
| CDH1       | FAM47C        | MLL3   | MAP3K1         |
| COL17A1    | FOXA1         | CDH1   |                |
| EFNB1      | GATA3         | PTEN   |                |
| EGFR       | GPS2          | PIK3R1 |                |
| EHHADH     | MAP2K4        | AKT1   |                |
| EPAS1      | MAP3K1        | RUNX1  |                |
| EPHB1      | MLL3          | CBFB   |                |
| EZR        | NCOR1         | TBX3   |                |
| FMN1       | NF1           | NCOR1  |                |
| GRB2       | OR2L2         | CTCF   |                |
| HRAS       | OR6A2         | FOXA1  |                |
| ITPR3      | PIK3CA        | SF3B1  |                |
| MAP2K4     | PIK3R1        | CDKN1B |                |
| MAP3K1     | PTEN          | RB1    |                |
| MAPK3      | PTPN22        | AFF2   |                |
| MDM2       | RB1           | NF1    |                |
| NCOR1      | RUNX1         | PTPN22 |                |
| PDGFB      | SF3B1         | PTPRD  |                |
| PIK3CB     | TBL1XR1       |        |                |
| PIP5K1A    | TBX3          |        |                |
| RAC1       | TLR4          |        |                |
| RAF1       | TP53          |        |                |
| RIPK1      | ZFP36L1       |        |                |
| RPS6KA3    |               |        |                |
| THBS1      |               |        |                |
| TSC1       |               |        |                |
| TSC2       |               |        |                |

Ellis, M. J. & Perou, C. M. (2013) 'The genomic landscape of breast cancer as a therapeutic roadmap', *Cancer Discov*, 3, 27-34.

TCGA (2012) 'Comprehensive molecular portraits of human breast tumours', *Nature*, 490, pp.61-70.

Banerji, S., Cibulskis, K., Rangel-Escareno, C., Brown, K. K., Carter, S. L., Frederick, A. M., et al. (2012) 'Sequence analysis of mutations and translocations across breast cancer subtypes.', *Nature*, 486, 405-409.
