# Supplementary material for: Pathway-Driven Discovery of Rare Mutational Impact on Cancer
Source: Biomed Res Int. 2014 May 4;2014:171892. doi: 10.1155/2014/171892 (PMC4026869; doi:10.1155/2014/171892)
Supplement: Supplementary file 4 [file 171892.f4.pdf]

**Supplement Table 2.** A list of abbreviations (alphabetical order)

| Abbreviation | Description                                                            |
|--------------|------------------------------------------------------------------------|
| CNV          | Copy Number Variation                                                  |
| FCS          | Functional Class Scoring                                               |
| FDA          | Food and Drug Administration                                           |
| FDR          | False Discovery Rate                                                   |
| iPAS         | individualized Pathway Aberrance Score                                 |
| ORA          | Over-Representing Analysis                                             |
| PARADIGM     | Pathway Recognition Algorithm using Data Integration on Genomic Models |
| PCA          | Principal Component Analysis                                           |
| PDS          | Pathway Deregulation Score                                             |
| RTK          | Receptor Tyrosine Kinase                                               |
| TCGA         | The Cancer Genome Atlas                                                |

"The authors declare that there is no conflict of interests regarding the publication of this article."
